# Supplementary material for: Folate as a potential treatment for lethal ventricular arrhythmias in TANGO2-deficiency disorder
Source: PubMed Central journal article supplement (PMC11382877; doi:10.1172/jci.insight.171005), 2024-06-10
Supplement: jciinsight-9-171005-s051.pdf [file jciinsight-9-171005-s051.pdf]

# Supplemental Figure 1

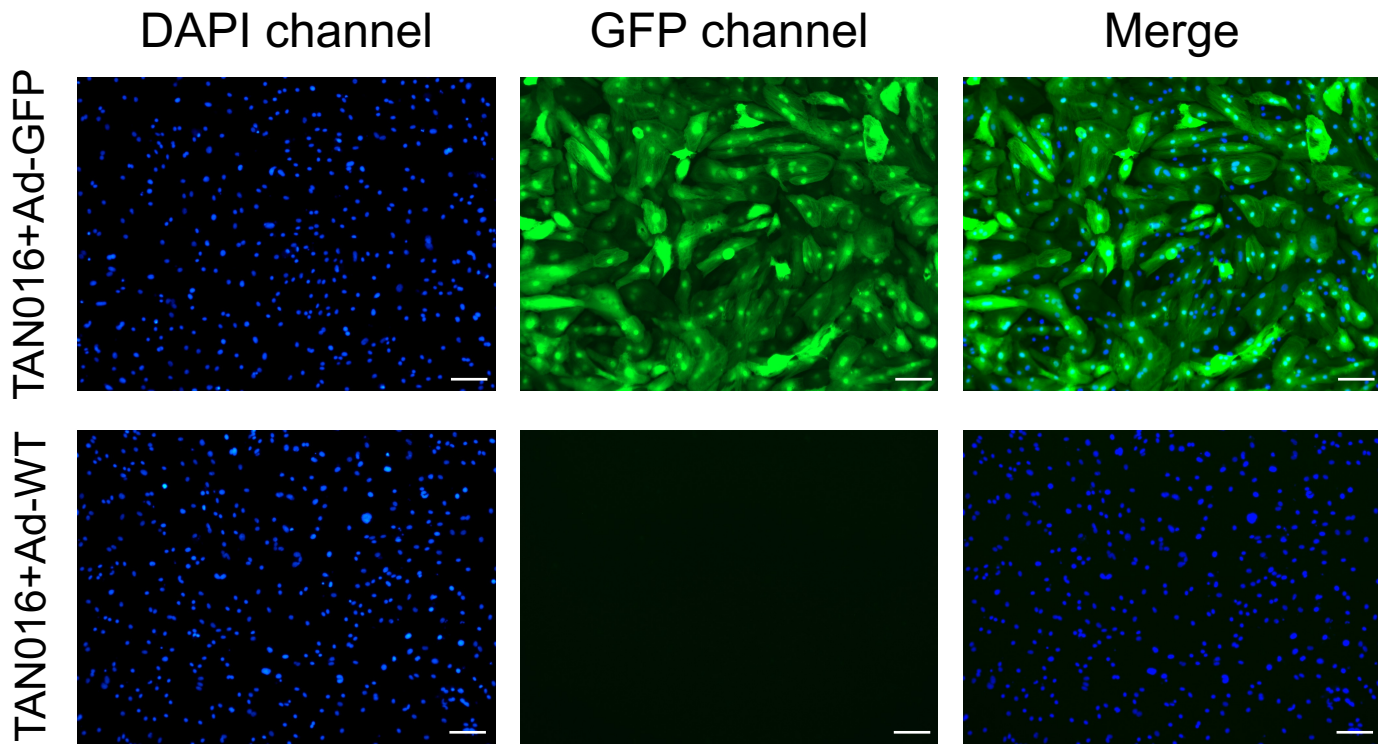

**Supplemental Figure 1. Adenoviral Infection efficiency on TAN016 iPSC-CMs.** Fluorescent images were taken from TAN016+Ad-GFP or TAN016+WT (negative control) 4 days post infection under the DAPI and GFP channels with the same settings. Hoechst 33342 was used to stain the nuclei in live iPSC-CMs. Scale bars indicate 100  $\mu$ m.

# Supplemental Figure 2

**A**

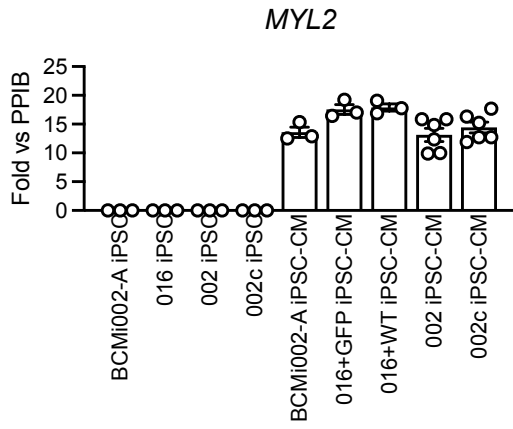

**B**

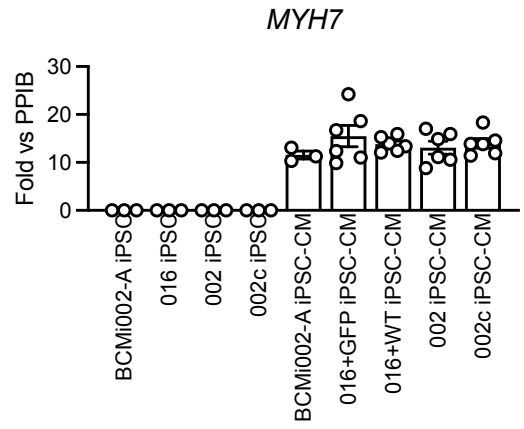

**C**

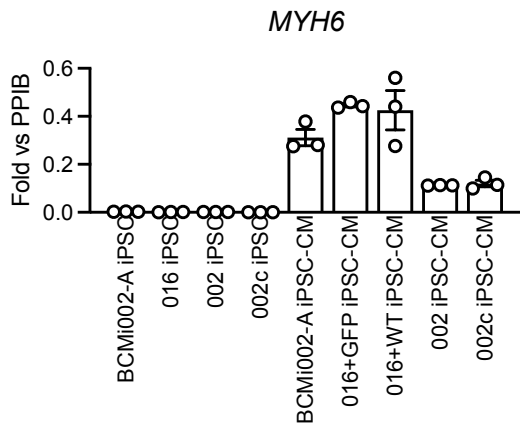

**D**

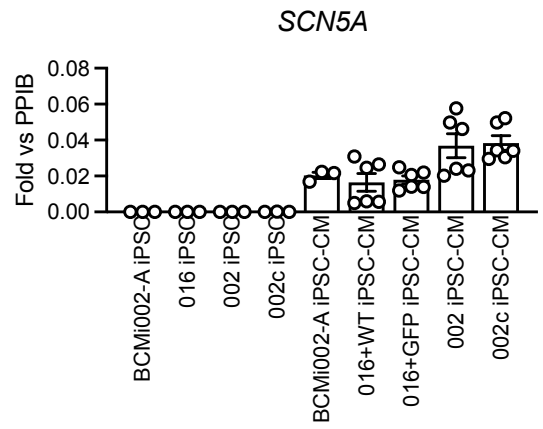

**E**

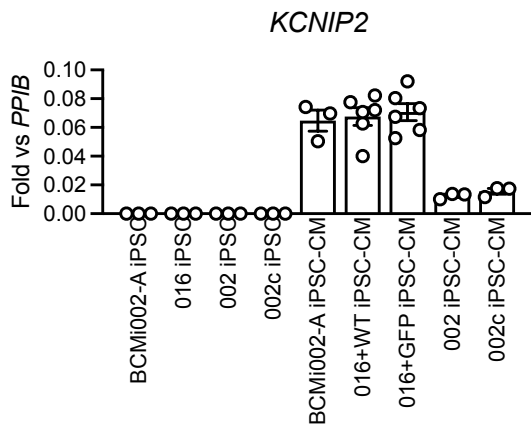

**F**

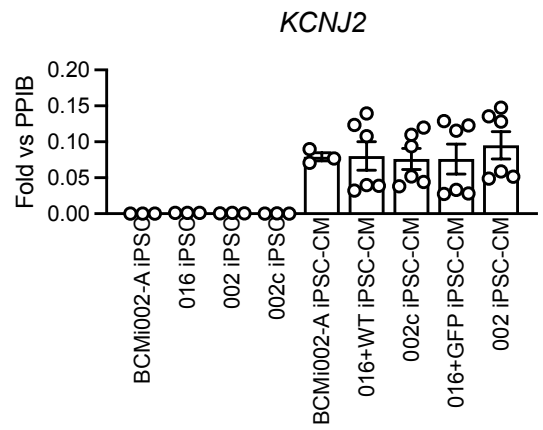

**G**

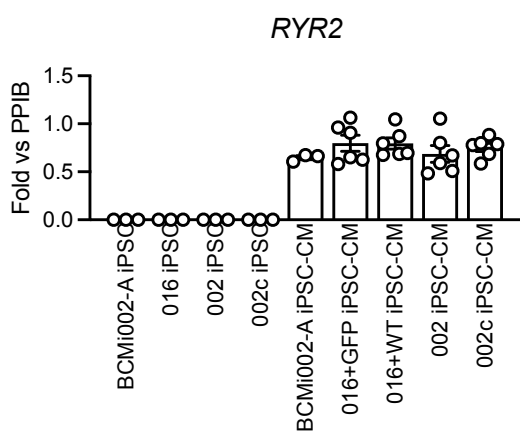

**H**

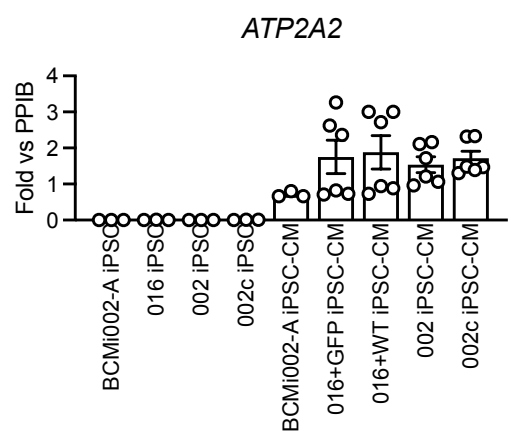

**Supplemental Figure 2. Transcriptional level of key cardiac marker genes in 4 iPSC and 5 iPSC-CM lines used in the study.** Quantification was performed by RT-PCR and presented as fold change vs *PPIB* (n=3-6). Data are mean + SEM. BCMi002-A iPSC/iPSC-CM was used as an additional independent WT control.

# Supplemental Figure 3

**A**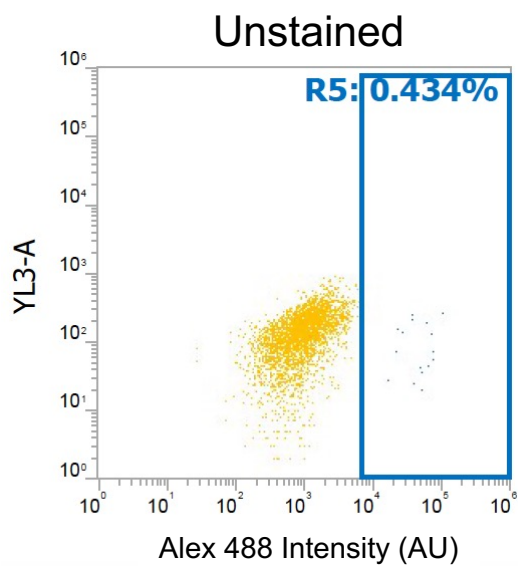**B**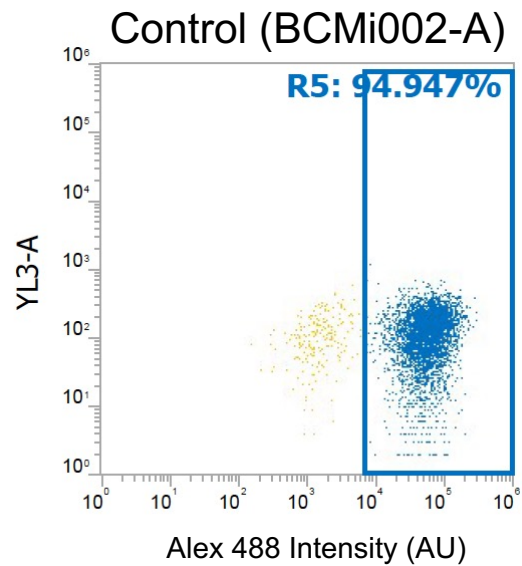**C**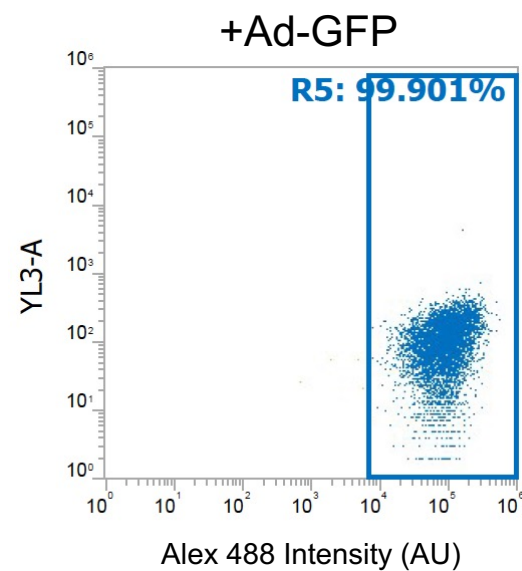**D**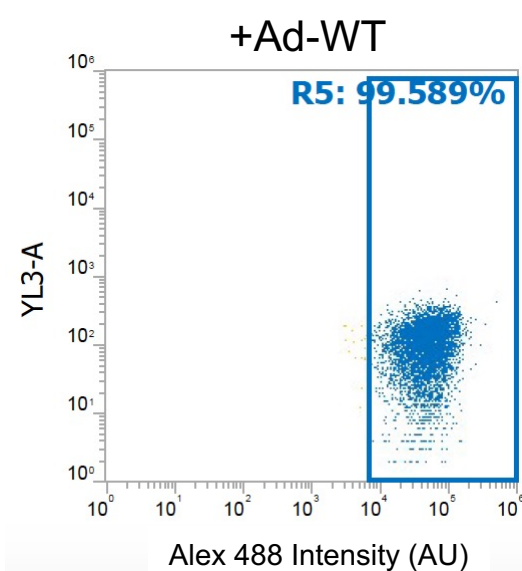**E**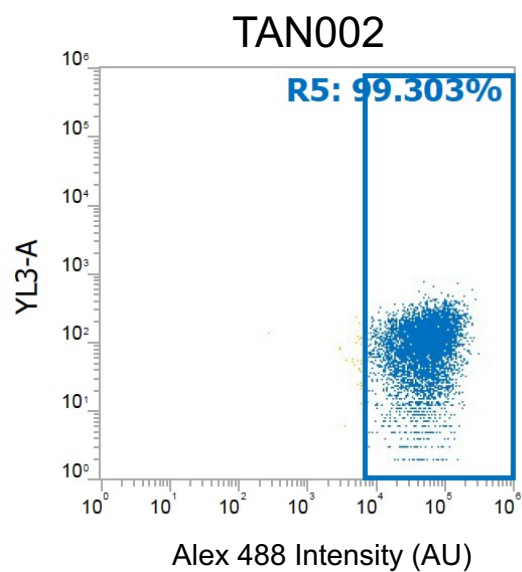**F**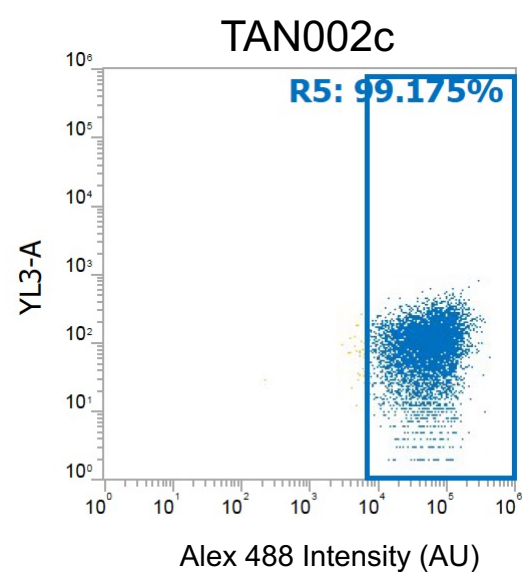

**Supplemental Figure 3. Analysis of cTnT-positive cells by flow cytometry.** Cells in experimental groups (B-F) were stained with primary antibody against cardiac troponin T (cTnT) and secondary antibody conjugated with Alexa Fluor® 488. Sample without primary antibody staining was used as unstained control for gating (A). Live/dead staining was also performed to exclude dead cells. cTnT-positive population was determined by the fluorescent intensity (arbitrary unit) of the Alexa fluor 488 channel. The percentage of cTnT-positive cells in each sample was shown on the graph.



# Supplemental Figure 5

**A**

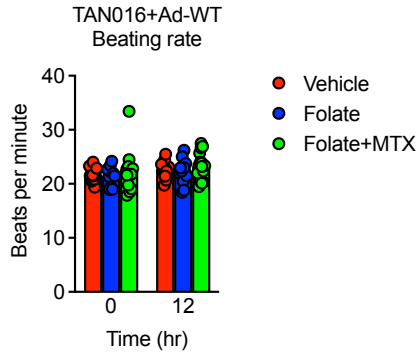

**B**

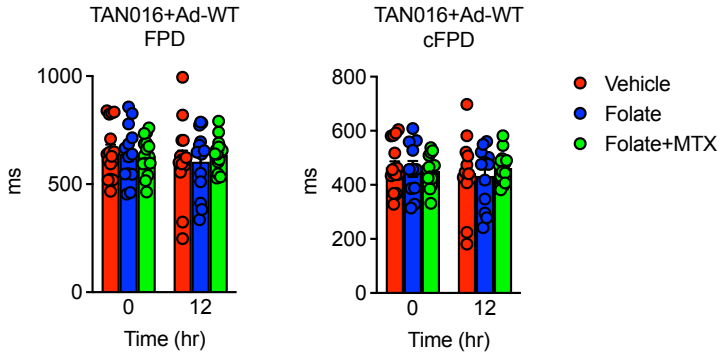

**C**

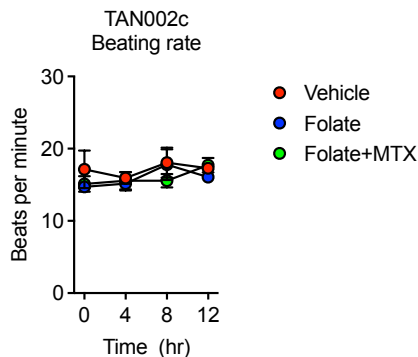

**D**

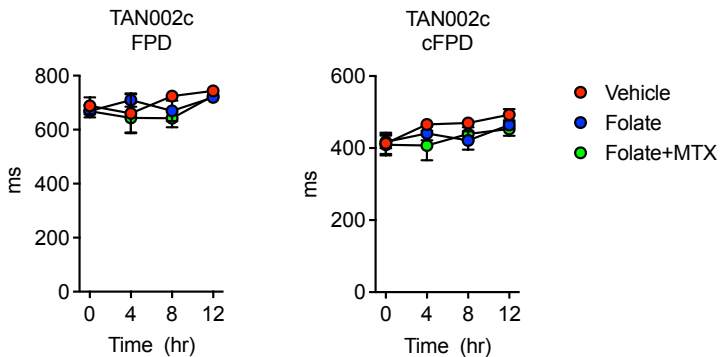

**E**

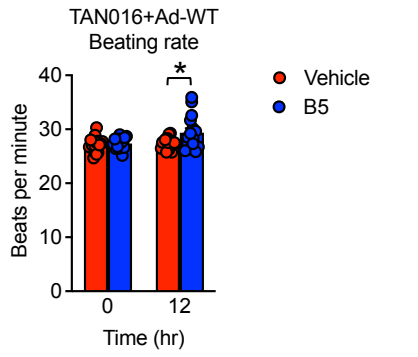

**F**

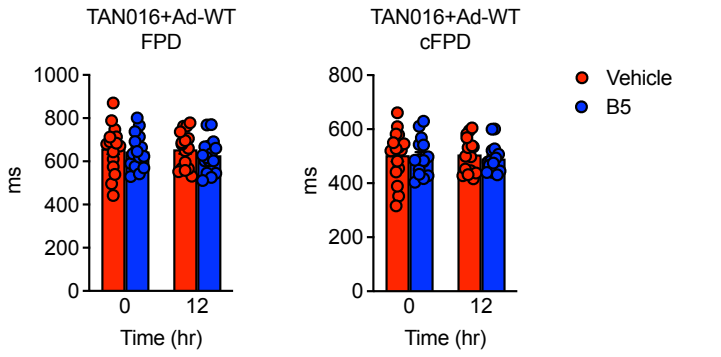

**G**

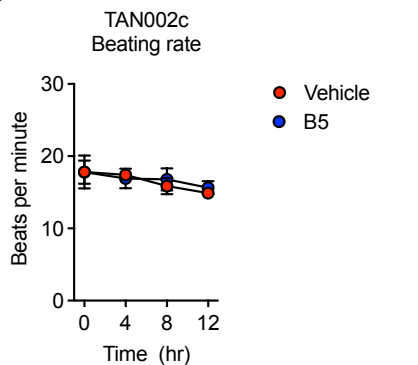

**H**

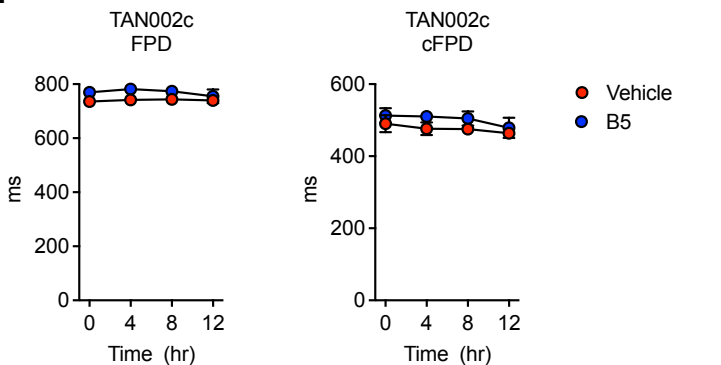

**Supplemental Figure 5. Effect of vehicle, folate, folate with MTX, and Vitamin B5 on the beating rate, FPD, and cFPD of isogenic WT iPSC-CMs. (A and B)** Effect of folate and folate+MTX treatment on the beating rate (A), FPD (left panel in B), and cFPD (right panel in B) of TAN016+Ad-WT iPSC-CMs. **(C and D)** Effect of folate and folate+MTX treatment on the beating rate (C), FPD (left panel in D), and cFPD (right panel in D) of TAN002c iPSC-CMs. **(E and F)** Effect of Vitamin B5 treatment on the beating rate (E), FPD (left panel in F), and cFPD (right panel in F) of TAN016+Ad-WT iPSC-CMs. **(G and H)** Effect of B5 treatment on the beating rate (G), FPD (left panel in H), and cFPD (right panel in H) of TAN002c iPSC-CMs. \*:  $p < 0.05$ , two-way ANOVA corrected by Sidak method ( $\alpha = 0.05$ ). Data are mean + SEM. Error bars smaller than the symbol size are not shown.



# Supplemental Figure 6

**A**

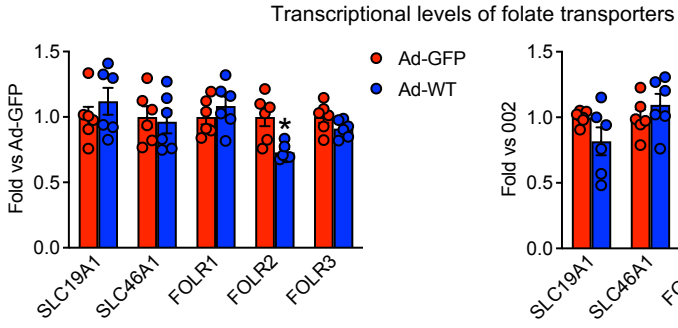

**B**

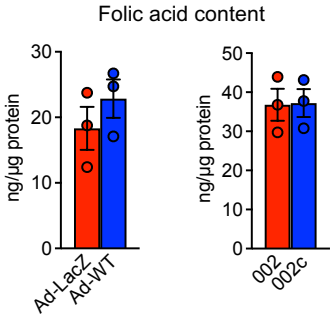

**C**

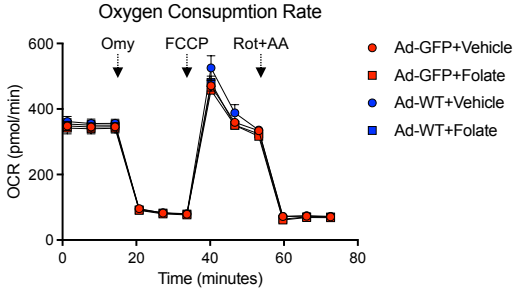

**D**

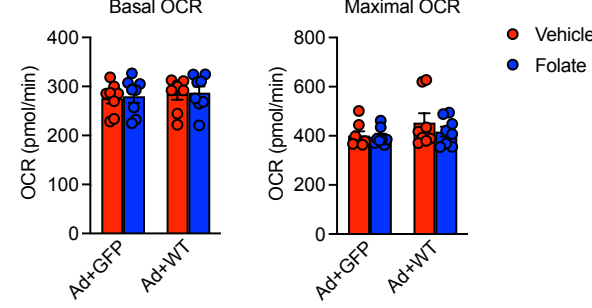

**E**

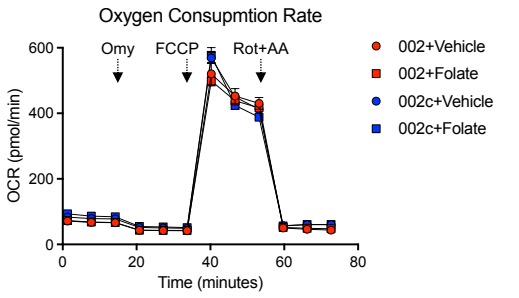

**F**

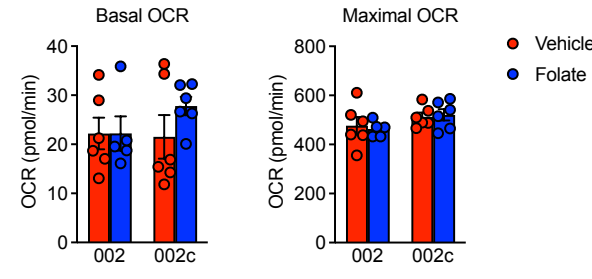

**G**

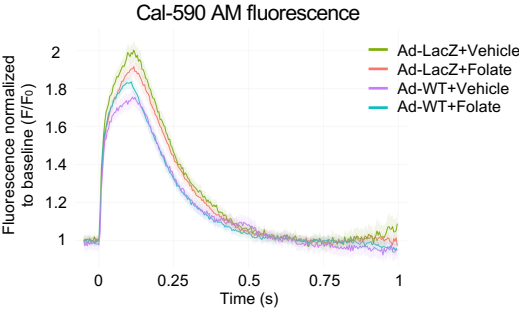

**H**

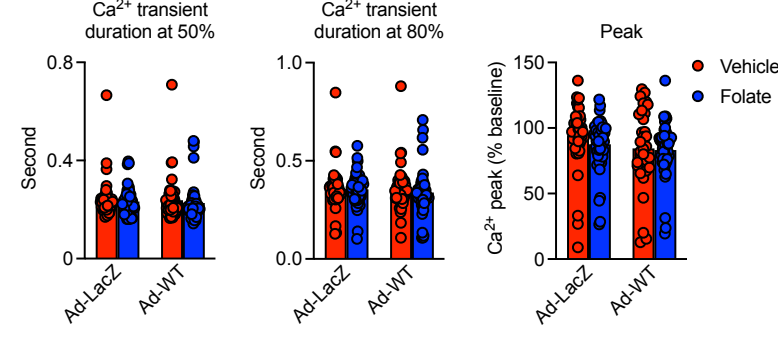

**I**

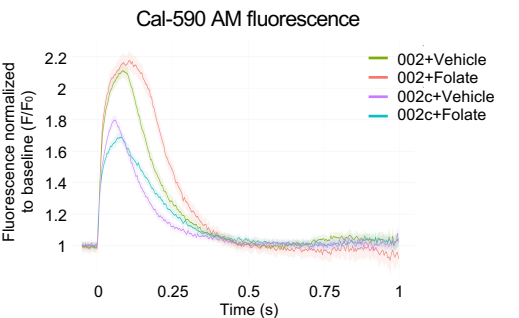

**J**

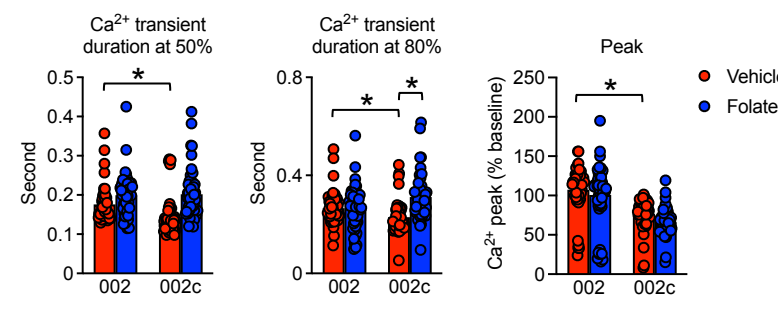

**Supplemental Figure 6. The anti-arrhythmic effect of folate is unrelated to OXPHOS and calcium handling capacity in TDD iPSC-CMs.** (A) Transcriptional level of five plasma folate transporters in TAN016+Ad-GFP/+Ad-WT (left panel) and TAN002/TAN00c (right panel) iPSC-CMs. Quantification was performed by RT-PCR (n=6). *PPIB* was used as internal control. \*p<0.05 vs Ad-GFP (left panel) or 002 (right panel). (B) Baseline folic acid level in TAN016+Ad-GFP/+Ad-WT (left panel) and TAN002/TAN00c (left panel) iPSC-CMs (n=3). The folic acid level was normalized to total protein level. (C and D) Oxygen consumption rate (OCR) measurement for TAN016+Ad-GFP/+Ad-WT iPSC-CMs with vehicle or folate (n=8). Arrows in C indicate drug injection of 3  $\mu$ M oligomycin (Omy), 0.5  $\mu$ M FCCP, 5  $\mu$ M rotenone (Rot) and 5  $\mu$ M antimycin A (AA). Quantification of basal OCR (left panel) and maximal OCR (right panel) is shown in D. (E and F) OCR measurement for TAN002 and TAN002c iPSC-CMs with vehicle or folate (n=5-6). Arrows in C indicate drug injection. Basal OCR (left panel) and maximal OCR (right panel) are shown in F. (G and H) Calcium transient analysis for TAN016+Ad-LacZ/+Ad-WT iPSC-CMs with vehicle or folate. Panel G shows the representative fluorescence recording tracings at 1Hz pacing. Panel H shows the quantification (n=46-48). (I and J) Calcium transient analysis for TAN002 and TAN002c with vehicle or folate. Panel I shows the representative fluorescence recording tracings at 1Hz pacing. Panel J shows the quantification (n=46-51). \*: p<0.05, two-way ANOVA corrected by Sidak method ( $\alpha=0.05$ ). Data are mean + SEM. Error bars smaller than the symbol size are not shown.

**Supplemental Table 1. List of qPCR primers**

| Target Gene    | Forward primer Sequence (5' to 3') | Reverse primer Sequence (5' to 3') | Roche Probe Number |
|----------------|------------------------------------|------------------------------------|--------------------|
| <i>MYL2</i>    | GCAGGCGGAGAGGTTTTTC                | AGTTGCCAGTCACGTCAGG                | 63                 |
| <i>MYH7</i>    | AGGAGCTCACCTACCAGACG               | TGCAGCTTGTCTACCAGGTC               | 62                 |
| <i>MYH6</i>    | CGACAAGATTGAGGACATGG               | CGCTCCTTGAGGTTGAAAAG               | 4                  |
| <i>SCN5A</i>   | GGCTCGACTTCCTCATCGTA               | TCCGCAGTGAAGGATGATGG               | 64                 |
| <i>KCNIP2</i>  | TGTACCGGGGCTTCAAGA                 | AAGGCATTGAAGAGAAAAGTGG             | 67                 |
| <i>RYR2</i>    | GCGGATCCAGTAAACACTTG               | TCCCATGTGGATAGTGCAT                | 63                 |
| <i>ATP2A2</i>  | GAAGAGAAGAAATGCACCTTGAG            | CCAACGAAGGTCAGATTGGT               | 53                 |
| <i>PIIB</i>    | GATGTCCAGGCCGATGCTG                | CAAGCATGTGGTGTGGCA                 | 10                 |
| <i>KCNJ2</i>   | TGTCACGGATGAATGCCCAA               | CAAACACAGCTTGCCGTCTC               | -                  |
| <i>SLC19A1</i> | CTTTGCCACCATCGTCAAGACC             | GGACAGGATCAGGAAGTACACG             | -                  |
| <i>SLC46A1</i> | ATGCAGCTTTCTGCTTTGGT               | GGAGCCACATAGAGCTGGAC               | -                  |
| <i>FOLR1</i>   | AGGTGCCATCTCTCCACAGT               | GAGGACAAGTTGCATGAGCA               | -                  |
| <i>FOLR2</i>   | CTGGCTCCTTGGCTGAGTTC               | GCCCAGCCTGGTTATCCA                 | -                  |
| <i>FOLR3</i>   | CCTGGATCCGGCAGGTC                  | CACAGGGGCACGTTTCTAGA               | -                  |

**Supplemental Video 1. TAN016 iPS-CMs after differentiation before replating**

**Supplemental Video 2. TAN016 iPSC-CMs after replating and infected with Ad-GFP**

**Supplemental Video 3. TAN016 iPSC-CMs after replating and infected with Ad-WT**

**Supplemental Video 4. TAN002 iPS-CMs after differentiation before replating**

**Supplemental Video 5. TAN002 iPS-CMs after replating**

**Supplemental Video 6. TAN002corr iPS-CMs after differentiation before replating**

**Supplemental Video 7. TAN002corr iPS-CMs after replating**
