# Supplementary material for: Folate as a potential treatment for lethal ventricular arrhythmias in TANGO2-deficiency disorder
Source: PubMed Central journal article supplement (PMC11382877; doi:10.1172/jci.insight.171005), 2024-06-10

# Full unedited gel for Figure 2B

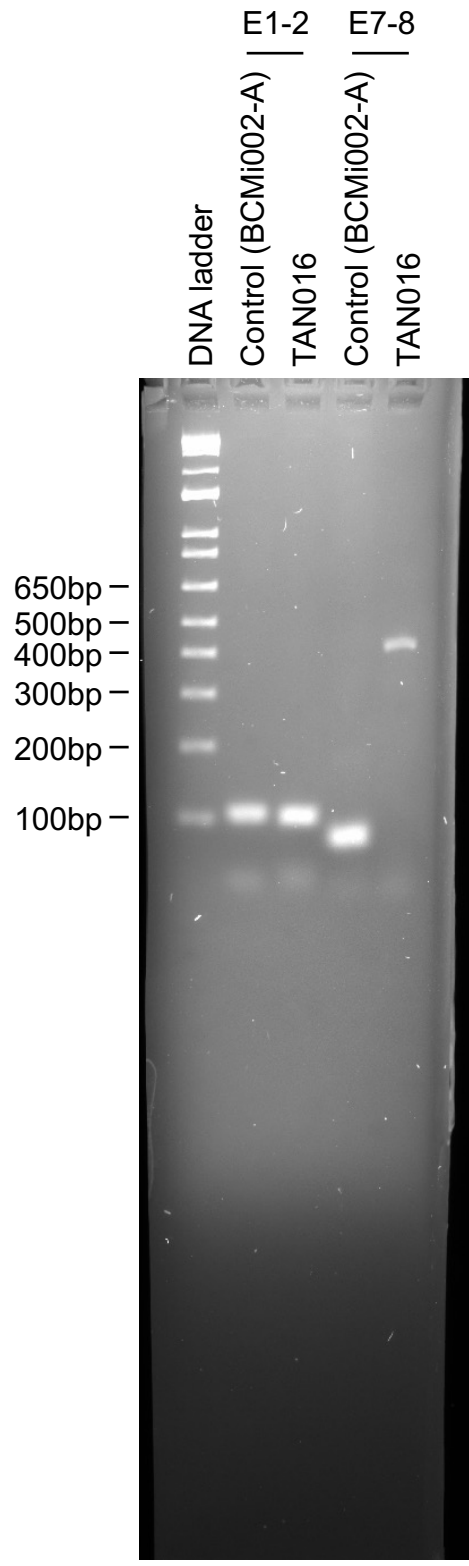

Full unedited gel for Figure 2D left panel

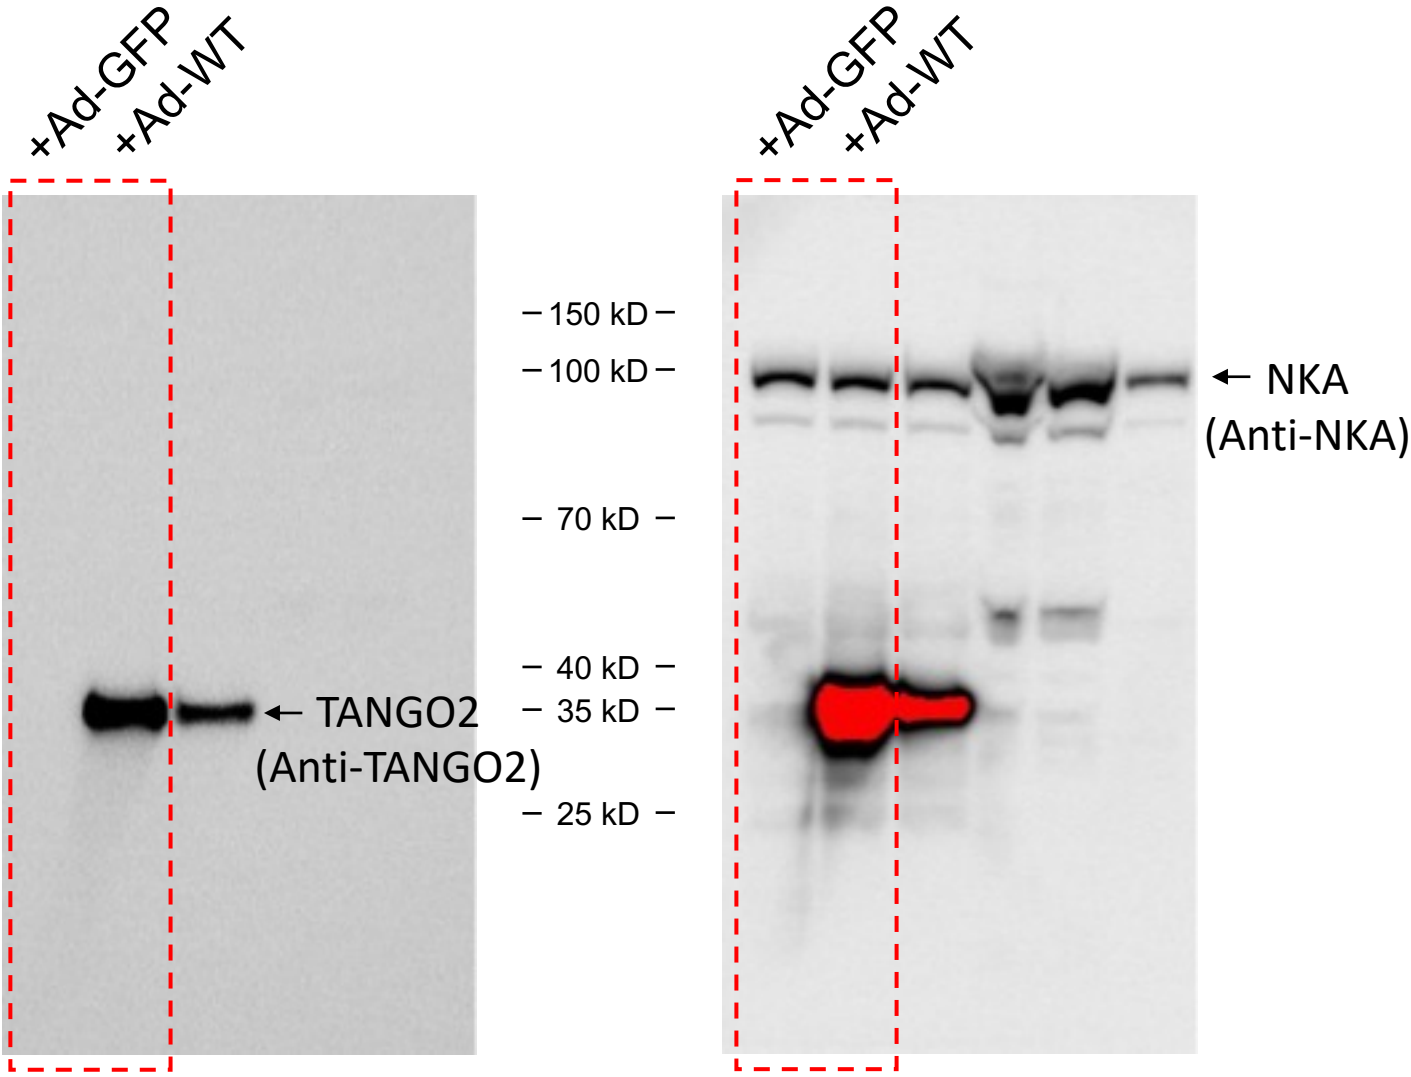

Full unedited gel for Figure 2D right panel

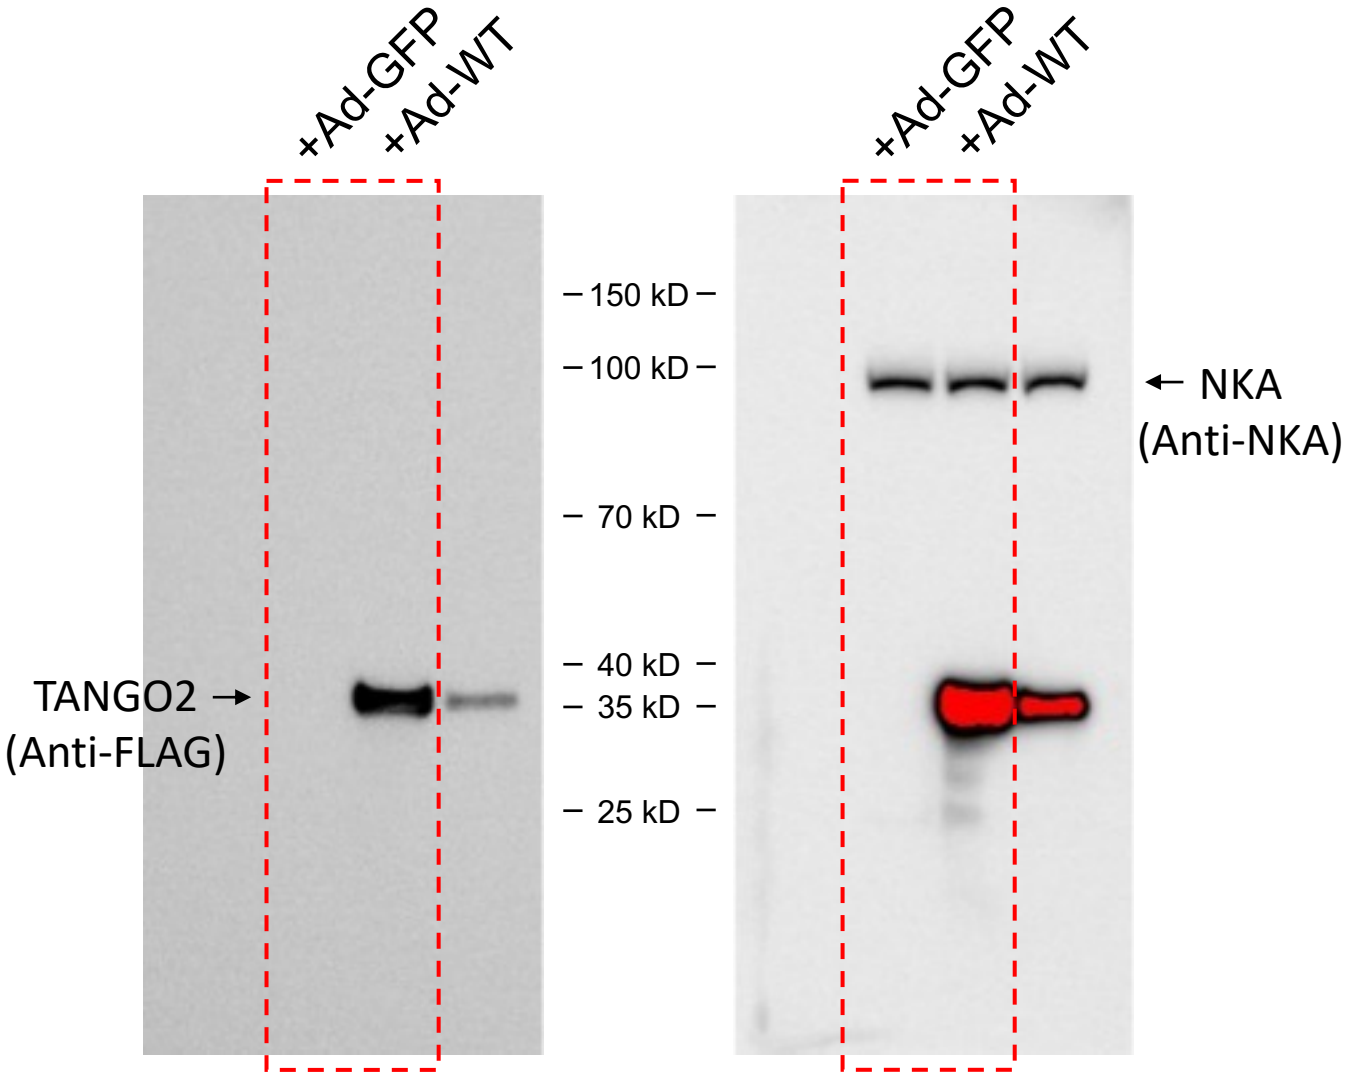

Full unedited gel for Figure 2F

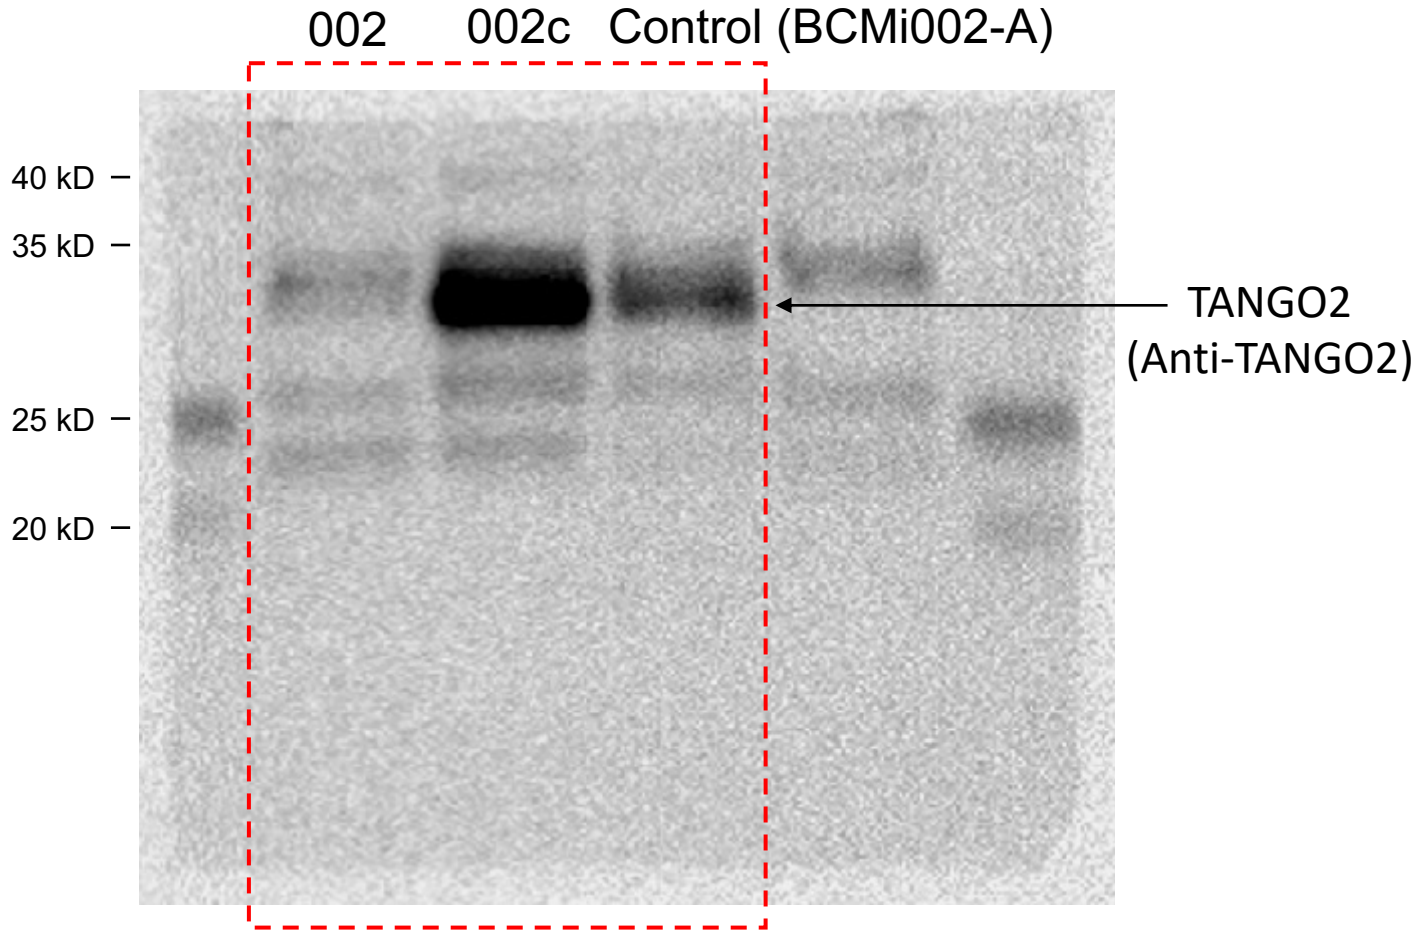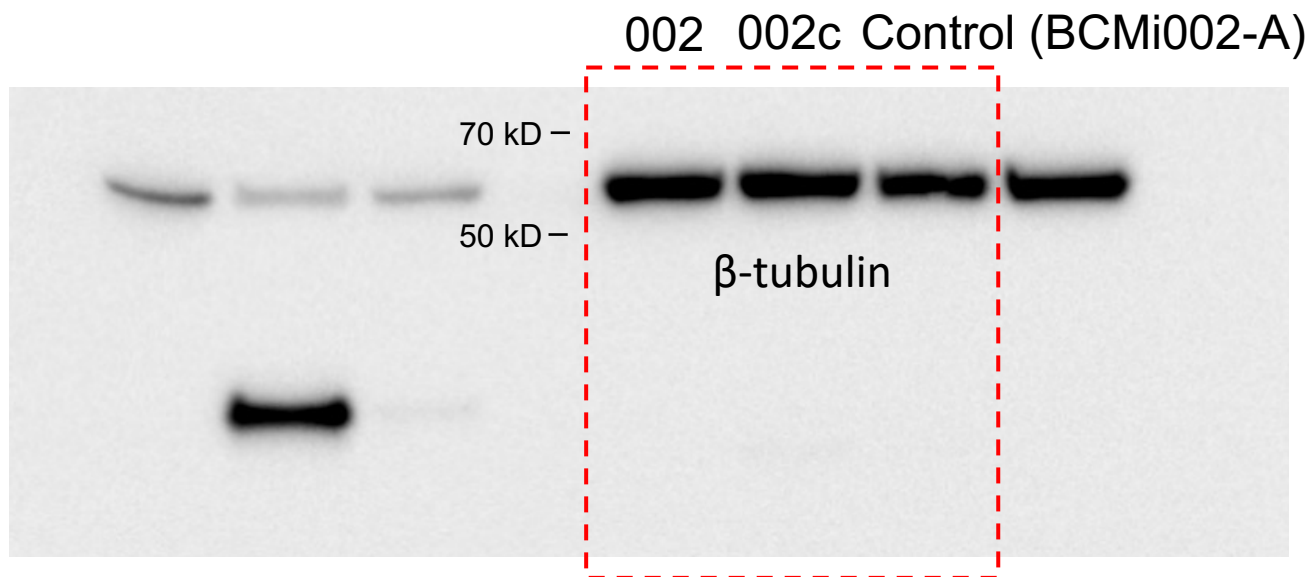

Supplement: jciinsight-9-171005-s052.pdf [file jciinsight-9-171005-s052.pdf]
